# Supplementary material for: Synthesis, Biological Evaluation and Docking Studies of Benzoxazoles Derived from Thymoquinone
Source: MDPI journal article supplement (doi:10.3390/molecules23123297), 2018-12-12
Supplement: s1 [file s1]

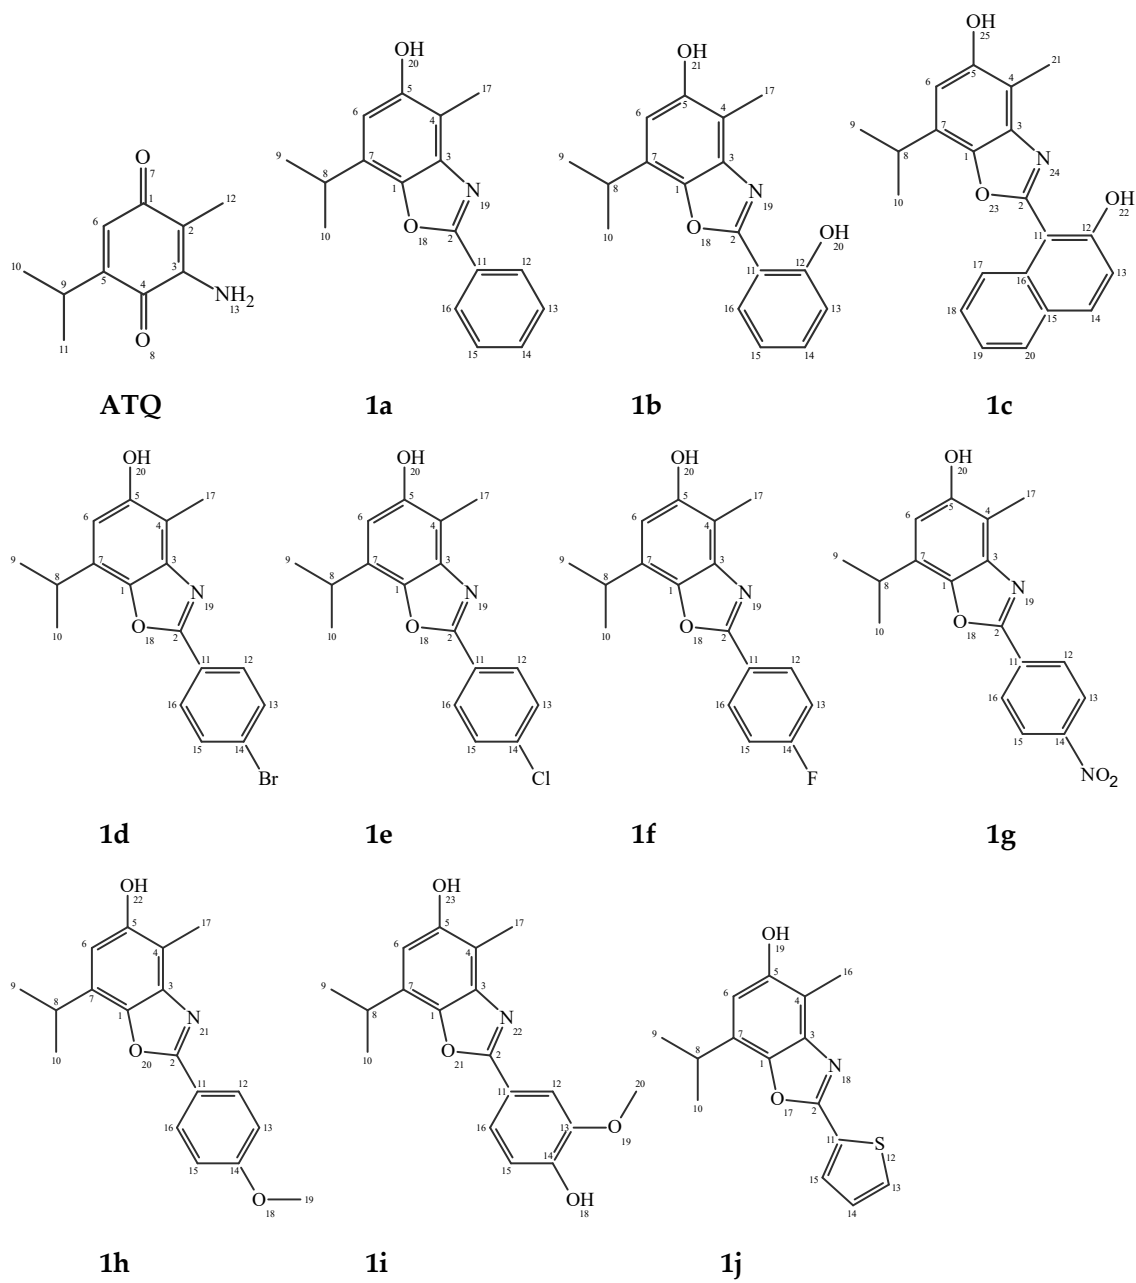

**Scheme S1.** Numbering scheme for 3-aminothymoquinone (ATQ) and series of benzoxazoles (**1a–1j**).

**Table S1.** The crystal structure data of compound **1a**.

| Empirical Formula                            | C <sub>17</sub> H <sub>17</sub> NO <sub>2</sub> |
|----------------------------------------------|-------------------------------------------------|
| M <sub>w</sub>                               | 267.31                                          |
| T, K                                         | 150(2)                                          |
| Crystal system                               | <i>monoclinic</i>                               |
| Space group                                  | <i>P 2<sub>1</sub>/n</i>                        |
| a, Å                                         | 7.7624 (2)                                      |
| b, Å                                         | 18.3338 (5)                                     |
| c, Å                                         | 10.0202 (3)                                     |
| α, deg.                                      | 90                                              |
| β, deg.                                      | 105.809 (3)                                     |
| γ, deg.                                      | 90                                              |
| V, Å <sup>3</sup>                            | 1372.08 (7)                                     |
| Z                                            | 4                                               |
| D <sub>calc</sub> , g/cm <sup>3</sup>        | 1.294                                           |
| μ, mm <sup>-1</sup>                          | 0.676                                           |
| F (000)                                      | 568                                             |
| Crystal size, mm                             | 0.60 × 0.60 × 0.40                              |
| Color                                        | colorless                                       |
| Data collected/unique                        | 5041/2687                                       |
| R <sub>int</sub>                             | 0.0178                                          |
| Restraints/parameters                        | 0/186                                           |
| S                                            | 1.021                                           |
| R <sub>1</sub> , wR <sub>2</sub> [I > 2σ(I)] | 0.0382/0.1026                                   |
| R <sub>1</sub> , wR <sub>2</sub> (all data)  | 0.0416/0.1056                                   |
| Larg. diff. peak/hole (e·Å <sup>-3</sup> )   | 0.23/−0.19                                      |

**Table S2.** Mobile phases used in purification of compounds **1a-1j**.

| <b>Compound</b> | <b>Mobile Phase</b>                                                                                                                                                    |
|-----------------|------------------------------------------------------------------------------------------------------------------------------------------------------------------------|
| <b>1a</b>       | <i>n</i> -hexane: Dichloromethane (DCM): Tetrahydrofuran (THF) = 50:50:1.4, gradually increasing quantity of THF until final concentration of 10% THF in combination   |
| <b>1b</b>       | <i>n</i> -hexane, then <i>n</i> -hexane: Diethyl ether (DEE) = 30:5                                                                                                    |
| <b>1c</b>       | <i>n</i> -hexane: DCM = 1:1, then <i>n</i> -hexane: DCM = 8:12, and at the end DCM 100%                                                                                |
| <b>1d</b>       | <i>n</i> -hexane, then <i>n</i> -hexane: THF = 12:1                                                                                                                    |
| <b>1e</b>       | <i>n</i> -hexane: DCM: THF = 50:50:4                                                                                                                                   |
| <b>1f</b>       | <i>n</i> -hexane: DCM: THF = 50:50:2, and after that content of <i>n</i> -hexane and DHM are decreased while content of THF is increased in ratios 30:30:3 and 20:20:4 |
| <b>1g</b>       | <i>n</i> -hexane, after that DEE is gradually added with increasing ratios <i>n</i> -hexane: DEE = 30:1, 30:2, 30:3, 30:5, 30:10 and 30:15                             |
| <b>1h</b>       | <i>n</i> -hexane: DCM: THF = 50:50:3, after that content of THF is increased 50:50:4, 50:50:5, 50:50:8, 50:50:10, 50:50:11 and 50:50:12                                |
| <b>1i</b>       | <i>n</i> -hexane: DEE = 2:1                                                                                                                                            |
| <b>1j</b>       | <i>n</i> -hexane: DCM: THF = 50:50:2.5                                                                                                                                 |
