# Supplementary material for: Synthesis, Biological Evaluation and Docking Studies of Benzoxazoles Derived from Thymoquinone
Source: MDPI journal article supplement (doi:10.3390/molecules23123297), 2018-12-12
Supplement: s1 [file s1]

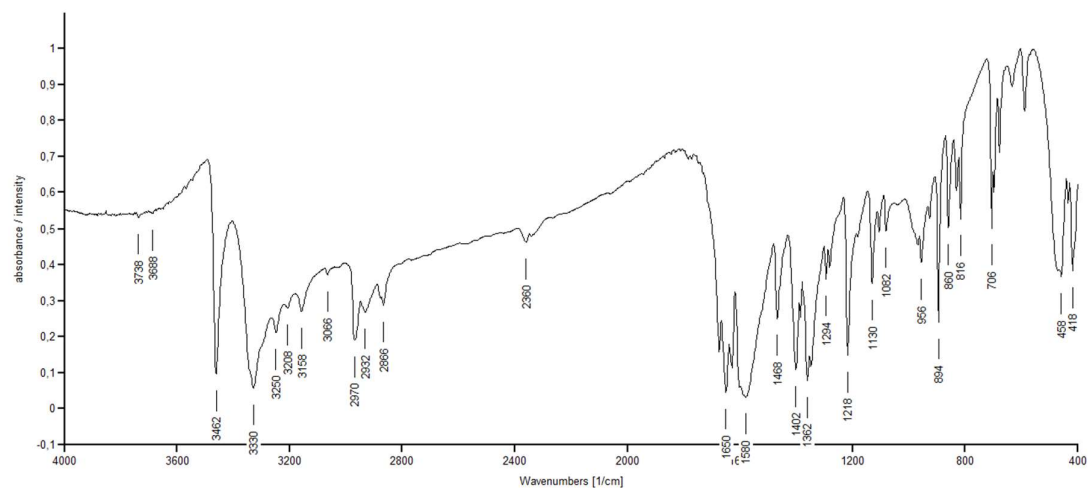

IR spectra for compound **ATQ**

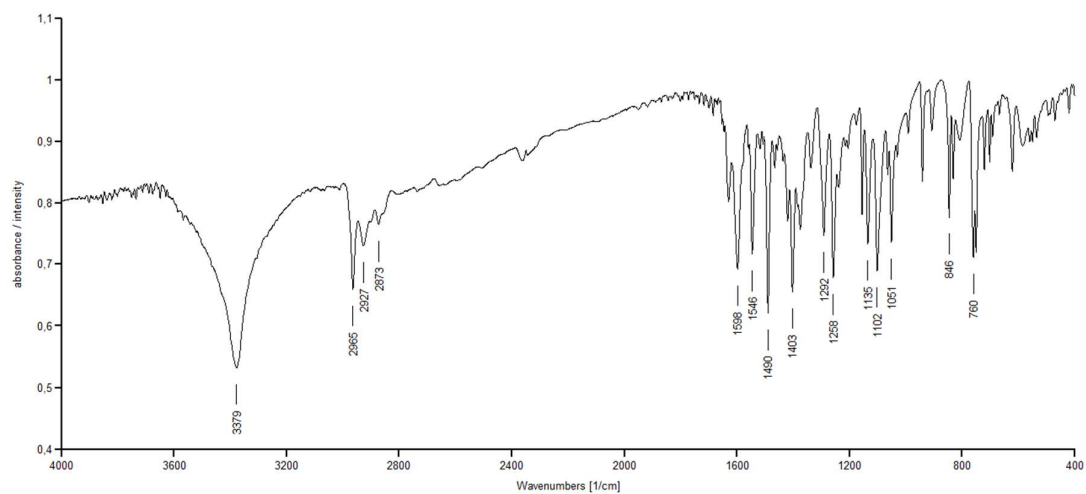

IR spectra for compound **1b**

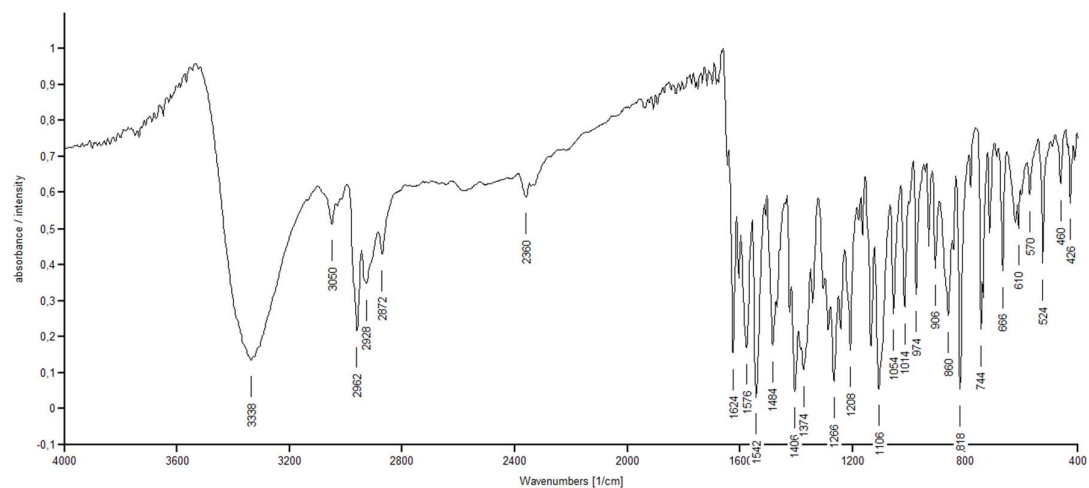

IR spectra for compound 1c

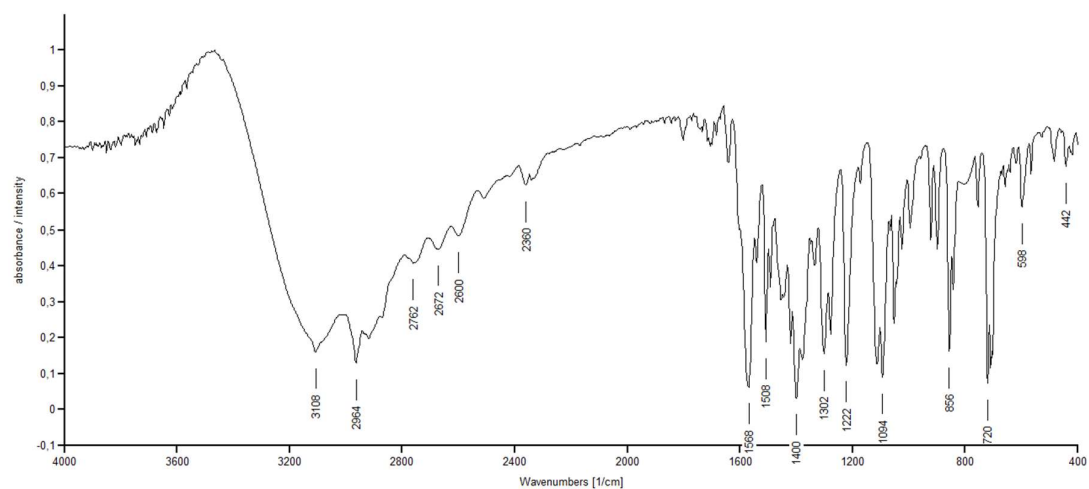

IR spectra for compound 1j
