# Supplementary material for: Synthesis, Biological Evaluation and Docking Studies of Benzoxazoles Derived from Thymoquinone
Source: MDPI journal article supplement (doi:10.3390/molecules23123297), 2018-12-12
Supplement: s1 [file s1]

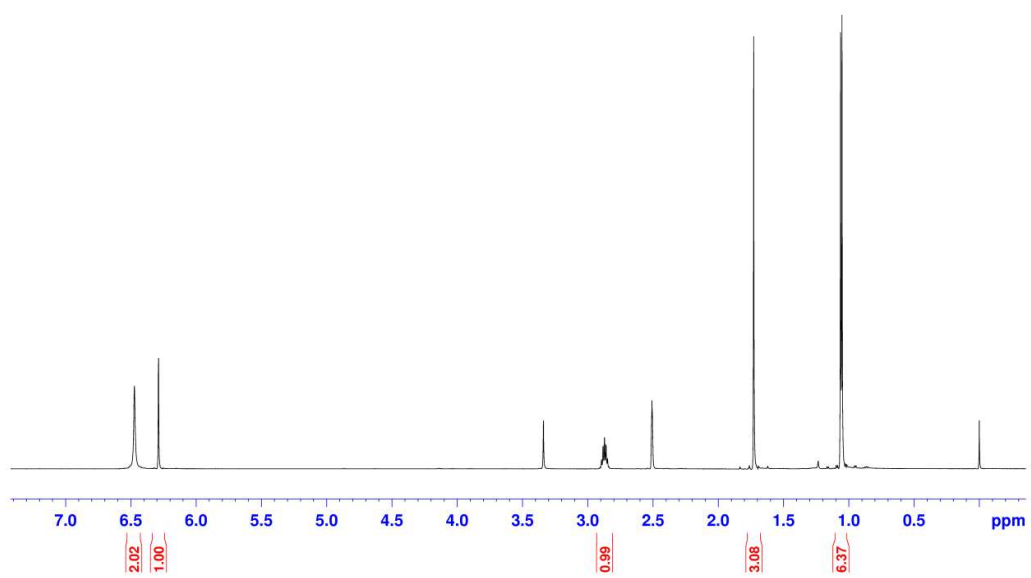

<sup>1</sup>H NMR spectra for compound ATQ.

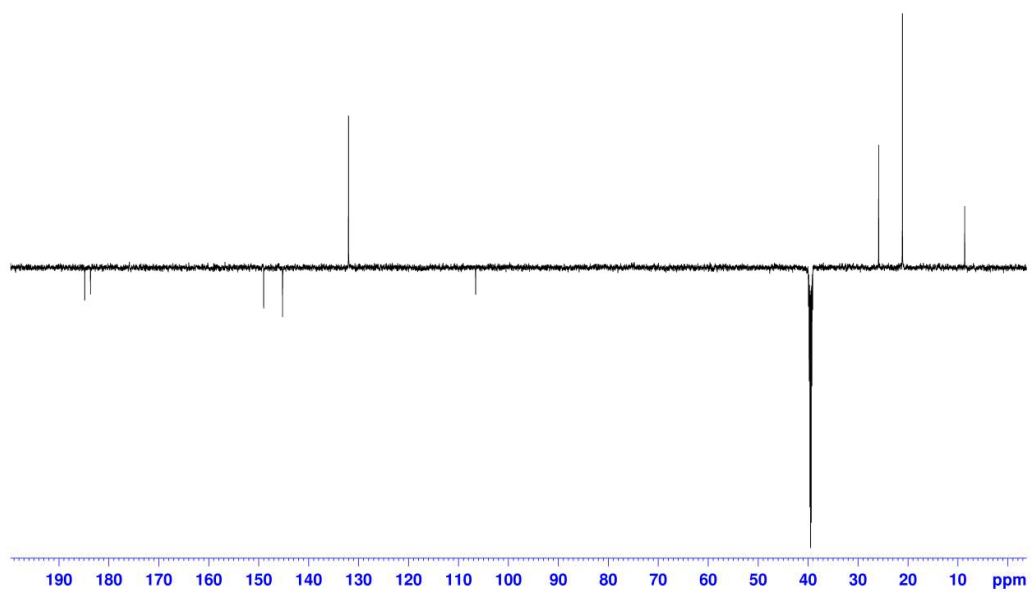

<sup>13</sup>C APT NMR spectra for compound ATQ.

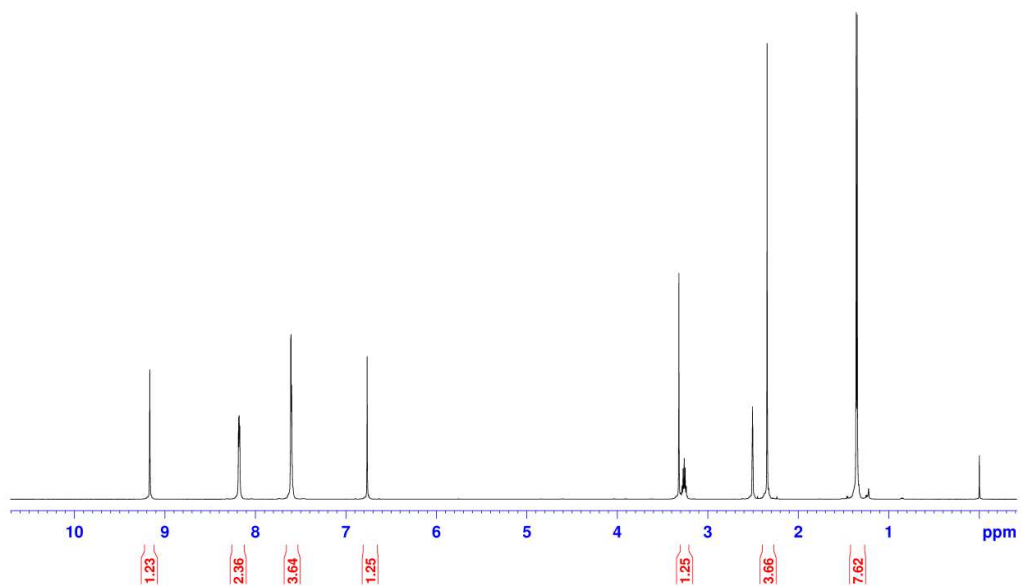

<sup>1</sup>H NMR spectra for compound **1a**.

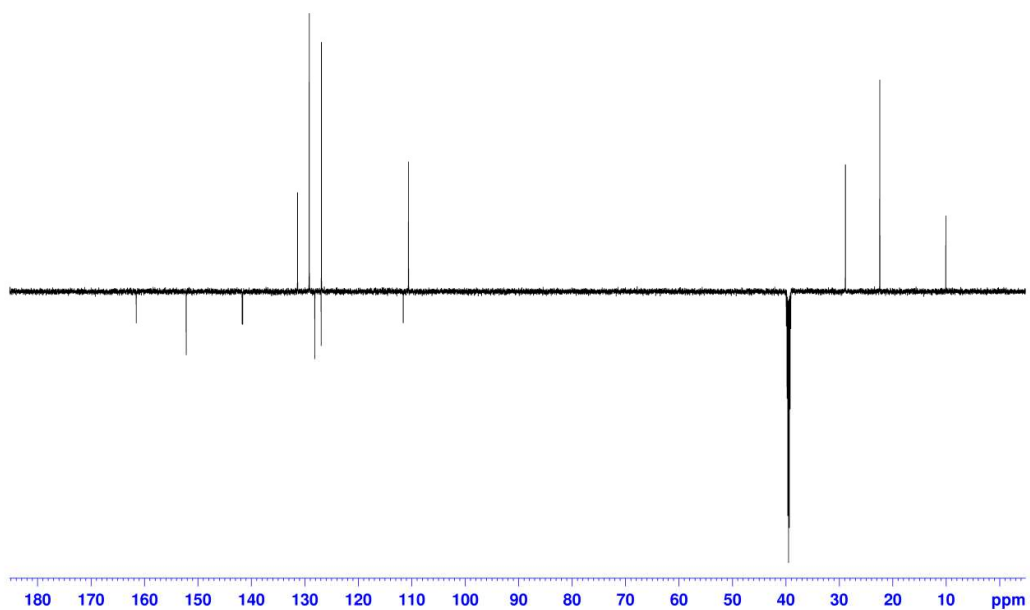

<sup>13</sup>C APT NMR spectra for compound **1a**.

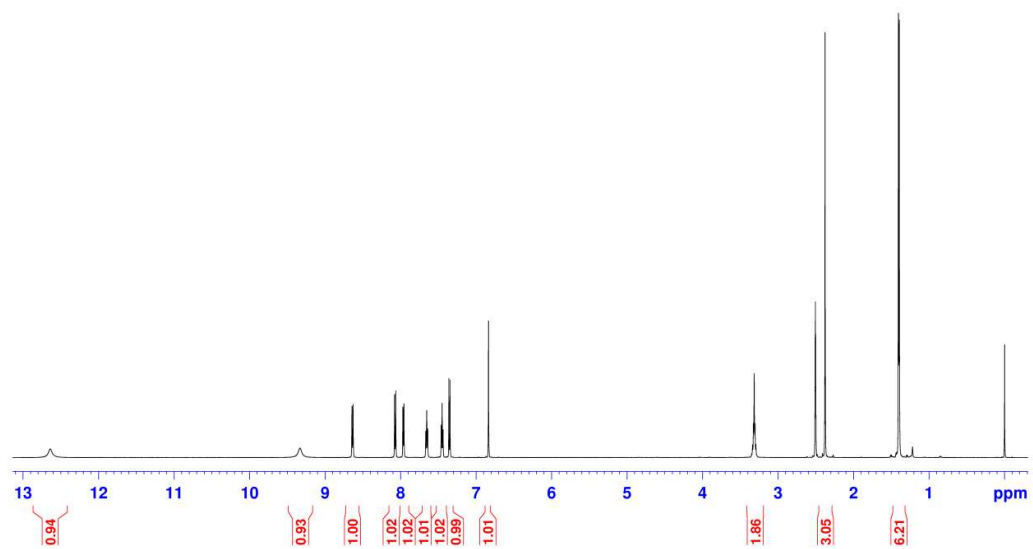

<sup>1</sup>H NMR spectra for compound **1b**.

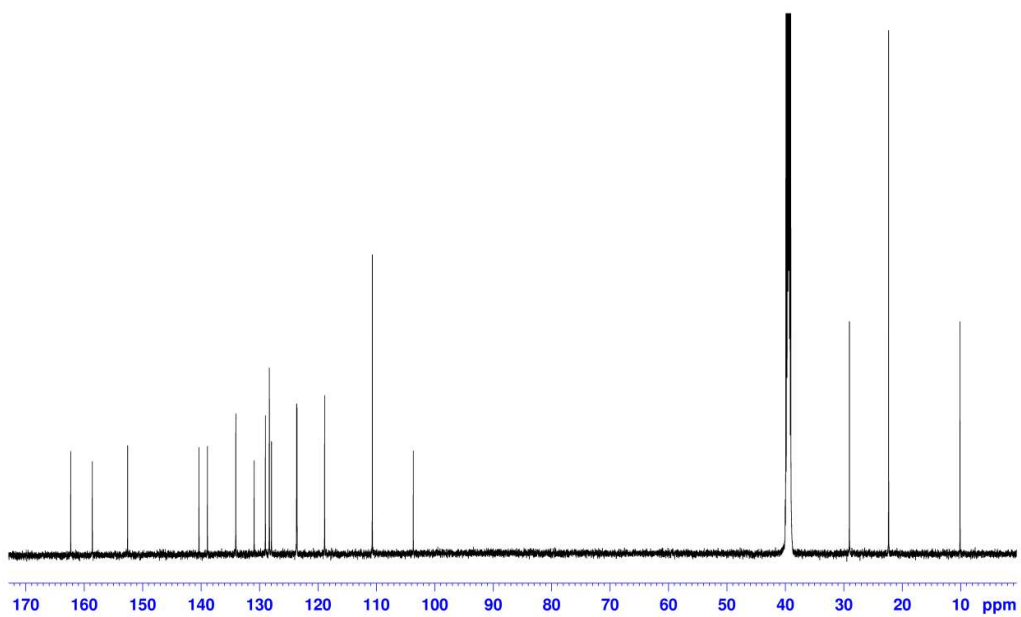

<sup>13</sup>C {<sup>1</sup>H} NMR spectra for compound **1b**.

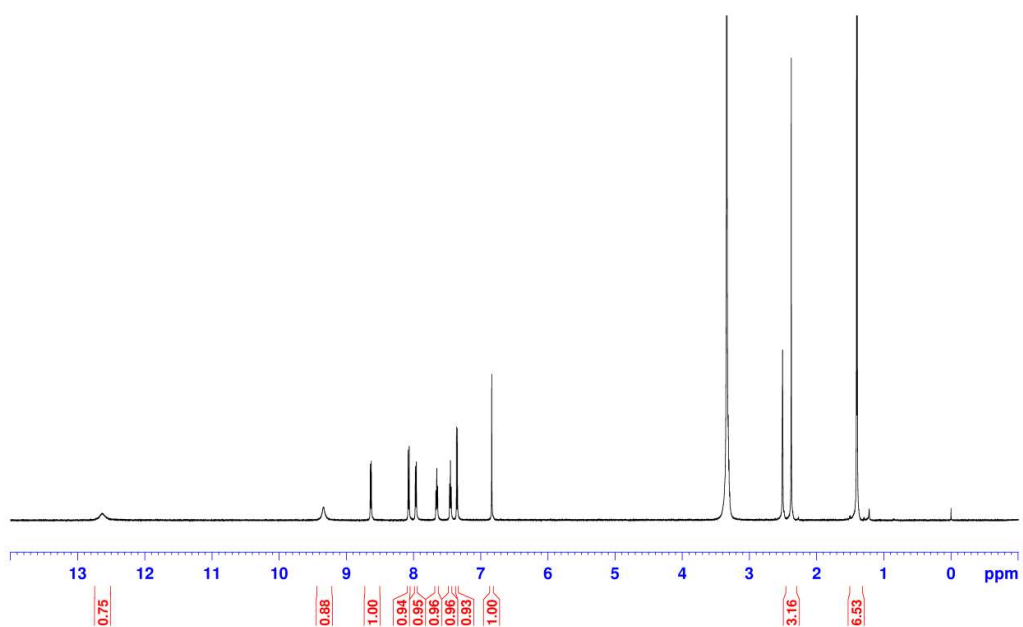

<sup>1</sup>H NMR spectra for compound **1c**.

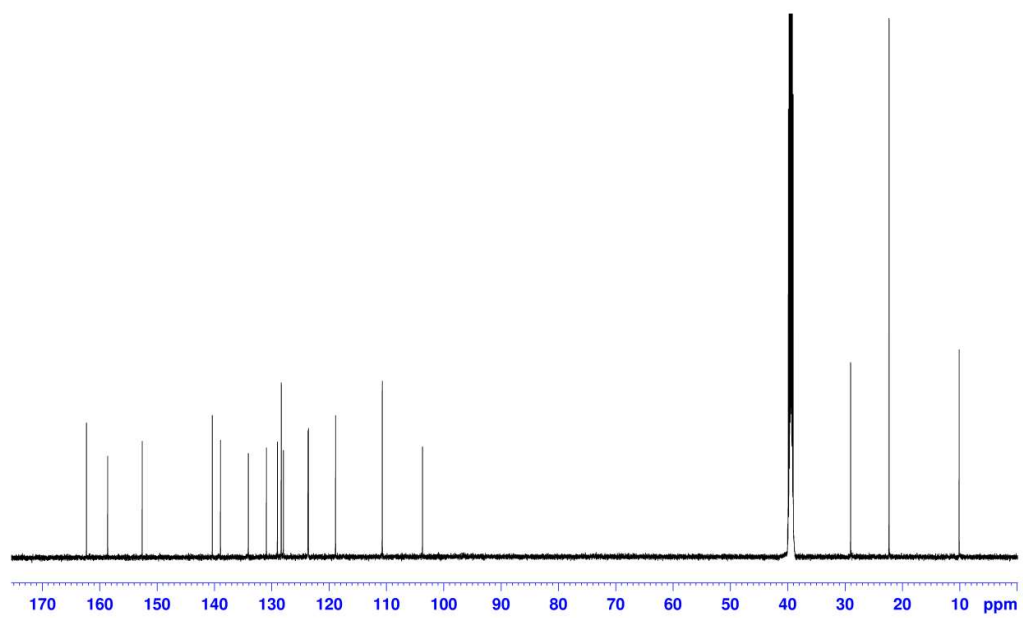

<sup>13</sup>C {<sup>1</sup>H} NMR spectra for compound **1c**.

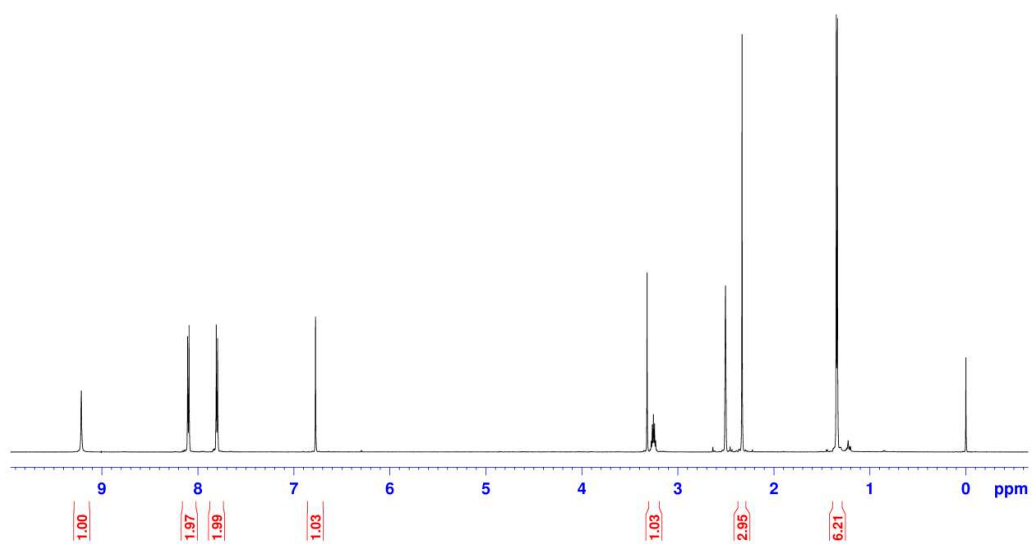

$^1\text{H}$  NMR spectra for compound **1d**.

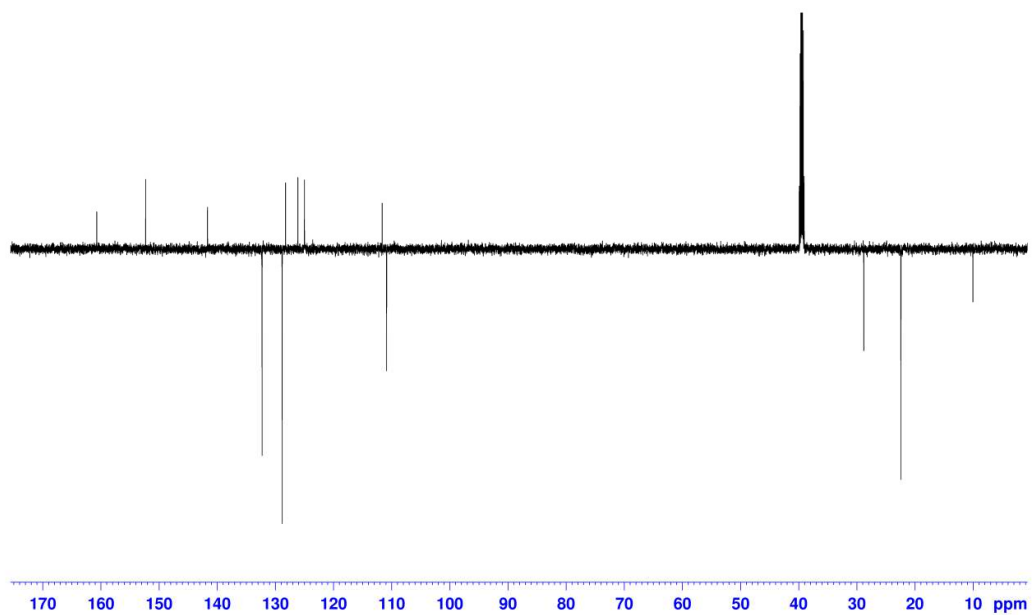

$^{13}\text{C}$  APT NMR spectra for compound **1d**.

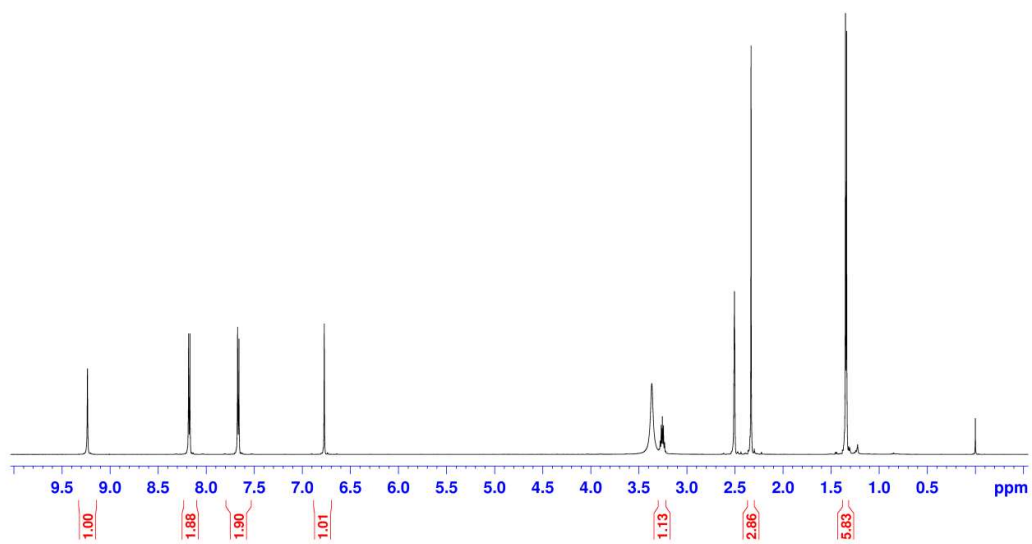

<sup>1</sup>H NMR spectra for compound **1e**.

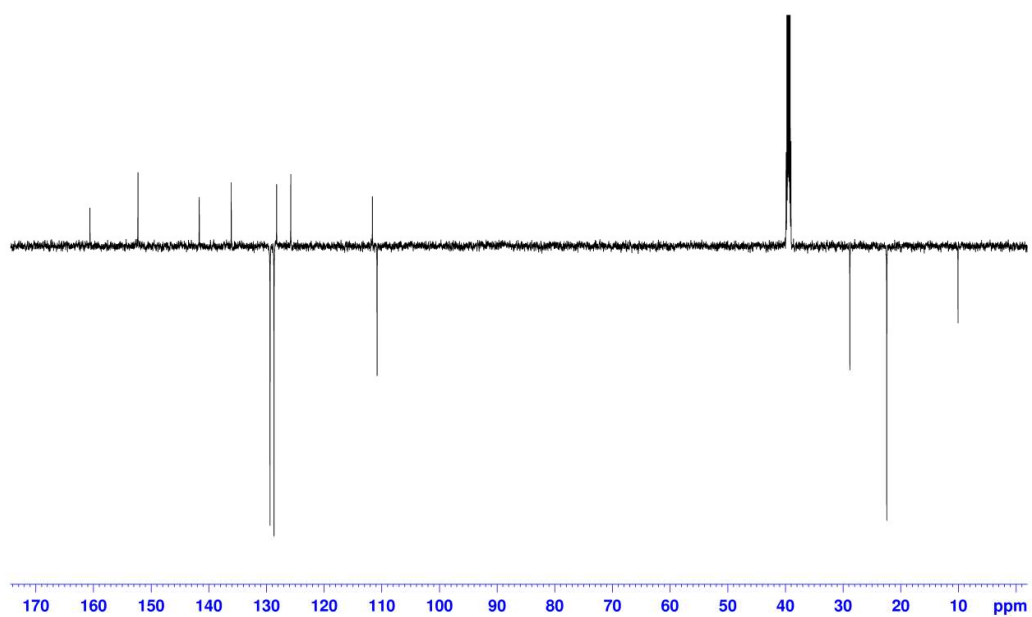

<sup>13</sup>C APT NMR spectra for compound **1e**.

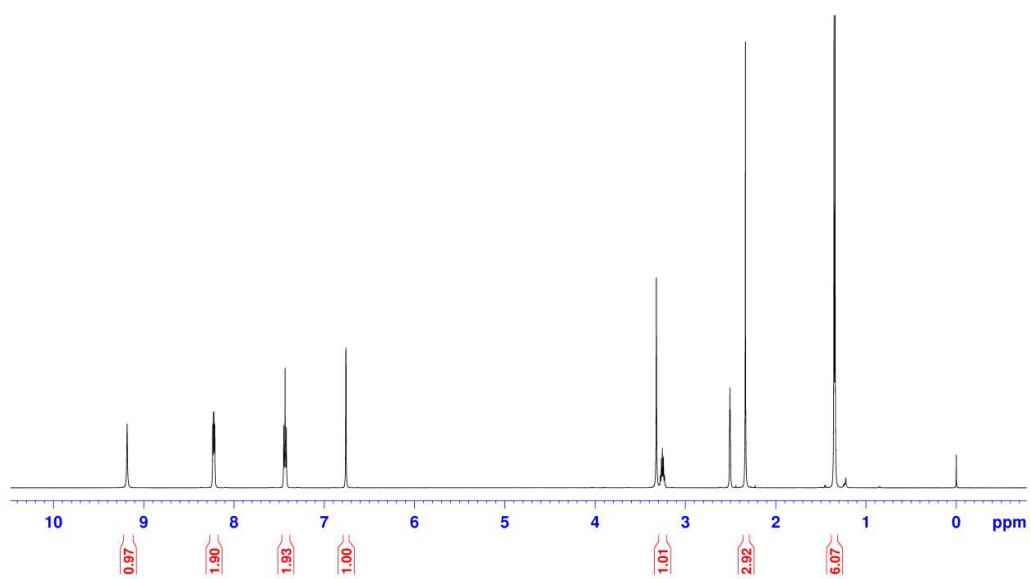

<sup>1</sup>H NMR spectra for compound **1f**.

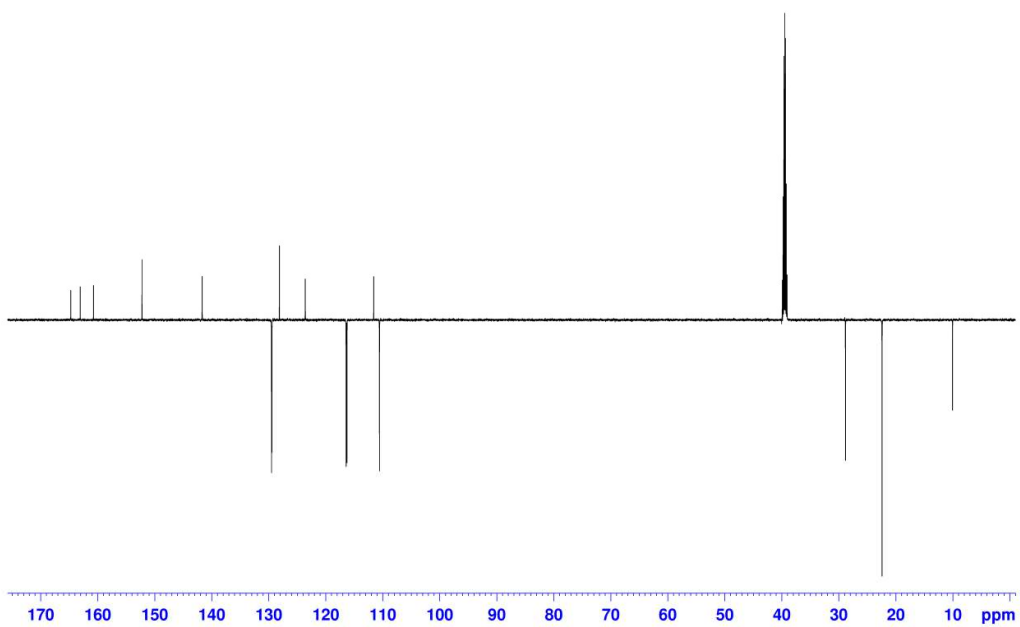

<sup>13</sup>C APT NMR spectra for compound **1f**.

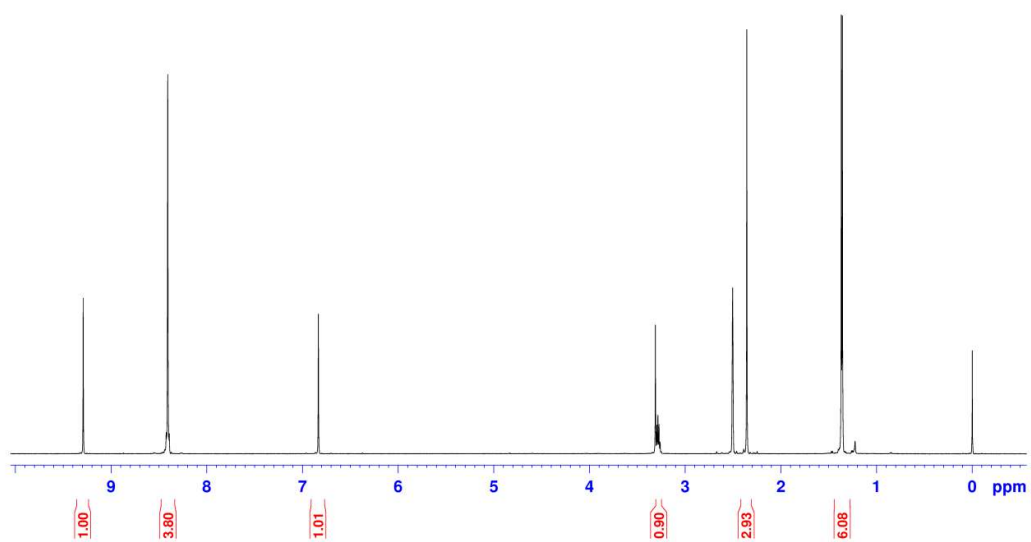

$^1\text{H}$  NMR spectra for compound **1g**.

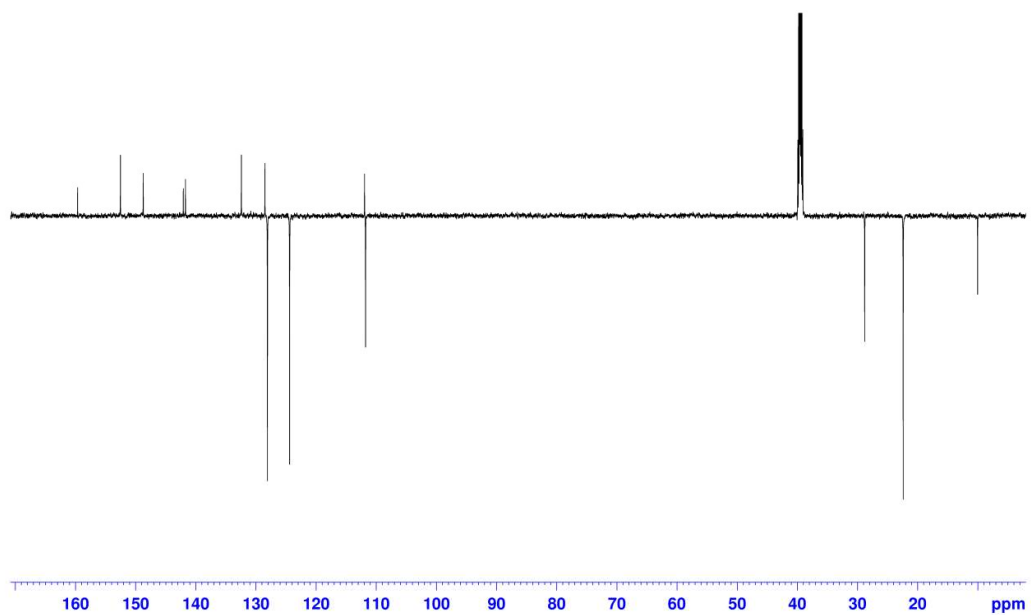

$^{13}\text{C}$  APT NMR spectra for compound **1g**.



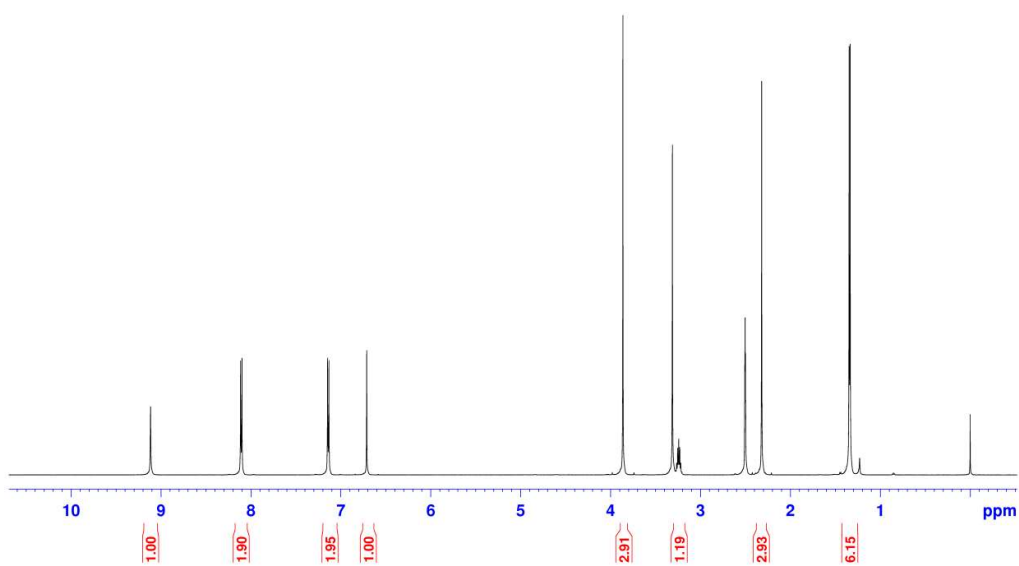

<sup>1</sup>H NMR spectra for compound **1h**.

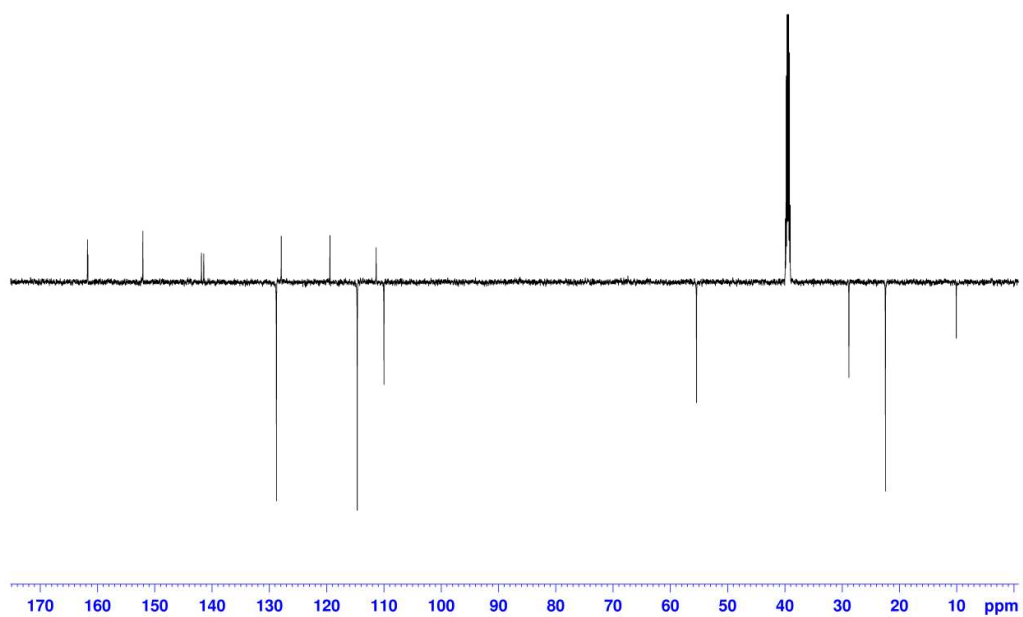

<sup>13</sup>C APT NMR spectra for compound **1h**.

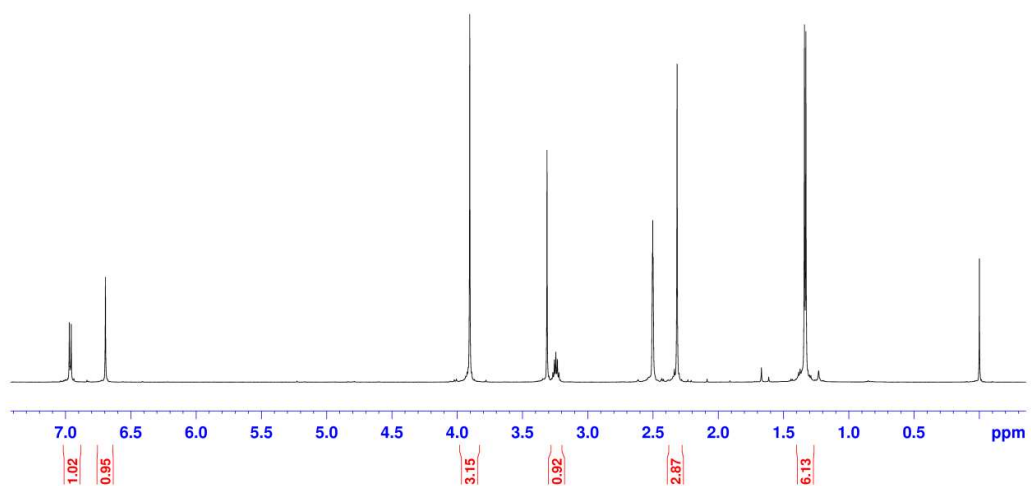

$^1\text{H}$  NMR spectra for compound **1i**.

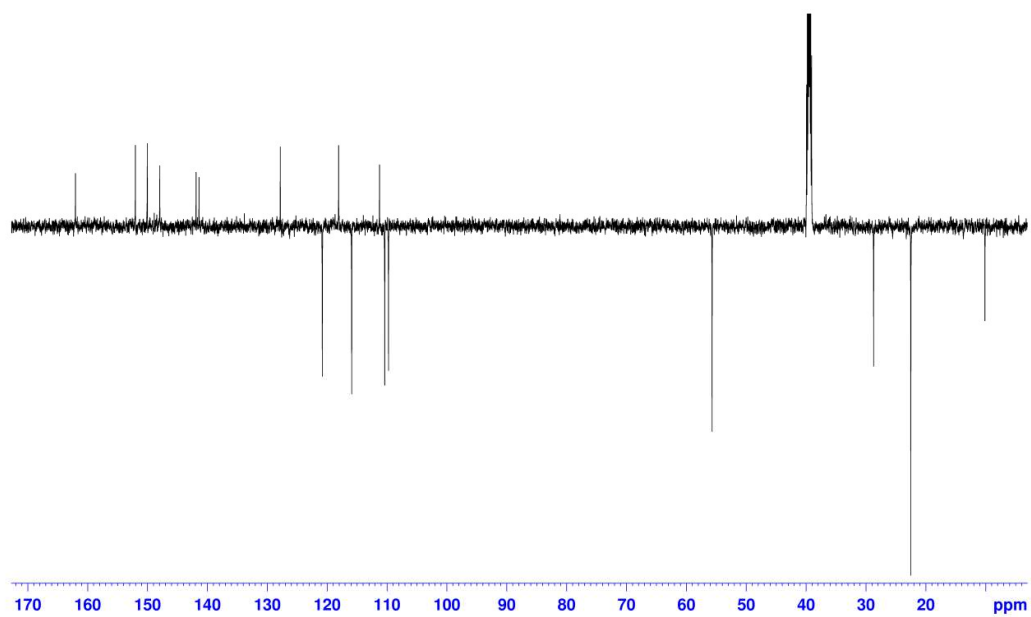

$^{13}\text{C}$  APT NMR spectra for compound **1i**.

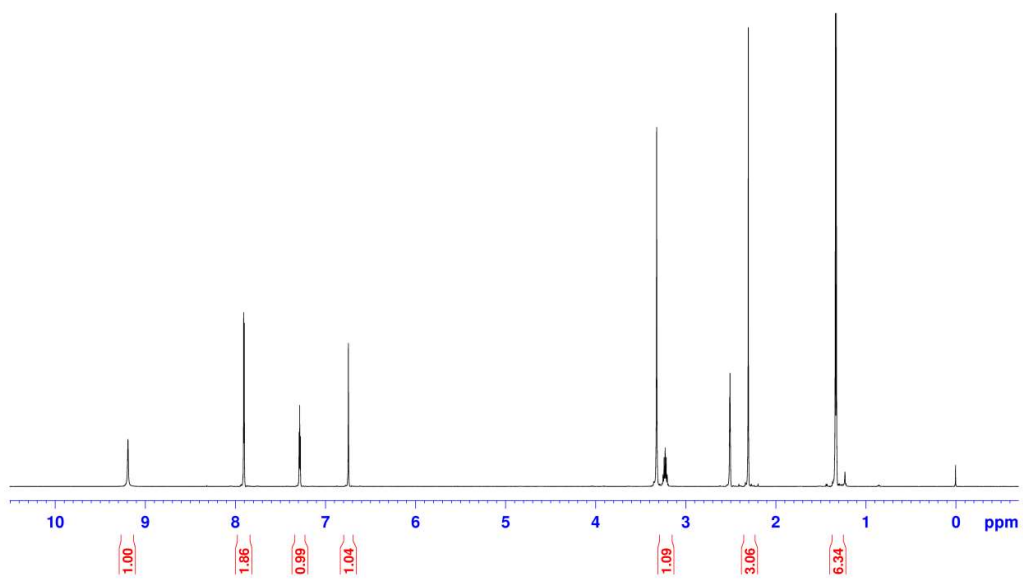

<sup>1</sup>H NMR spectra for compound **1j**.

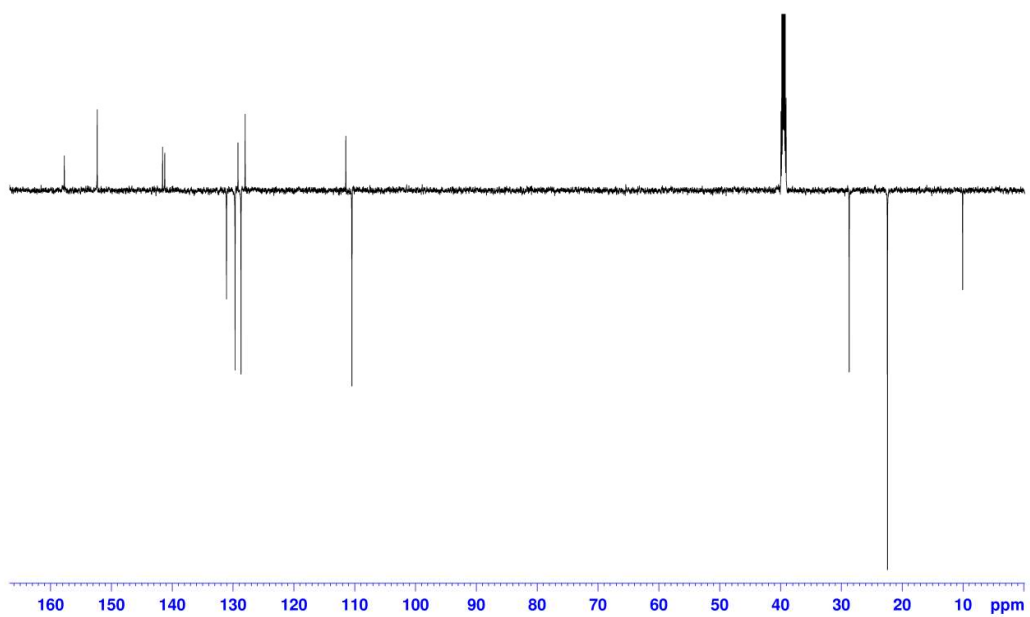

<sup>13</sup>C APT NMR spectra for compound **1j**.
