# Supplementary material for: Synthesis, Biological Evaluation and Docking Studies of Benzoxazoles Derived from Thymoquinone
Source: MDPI journal article supplement (doi:10.3390/molecules23123297), 2018-12-12
Supplement: s1 [file s1]

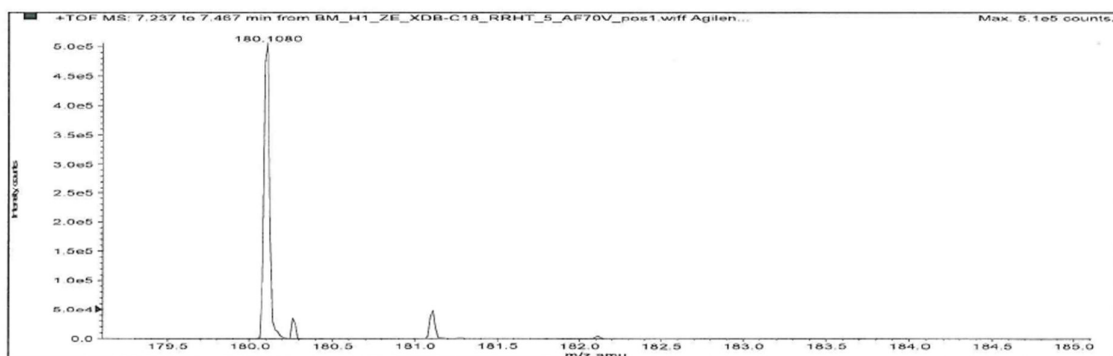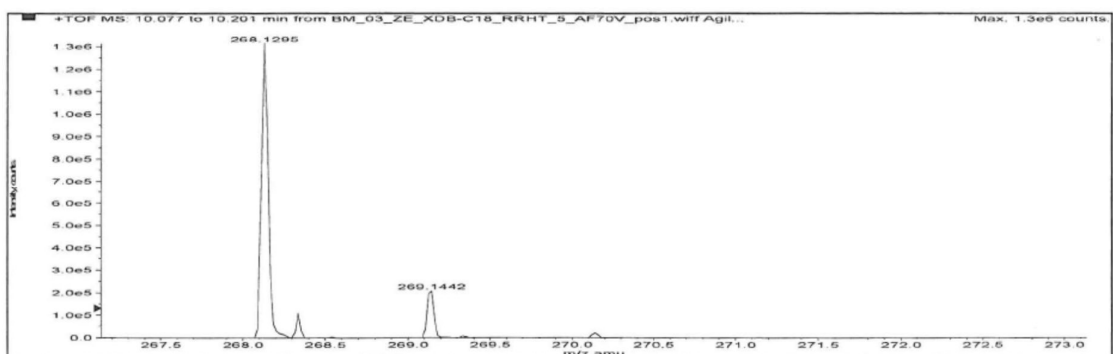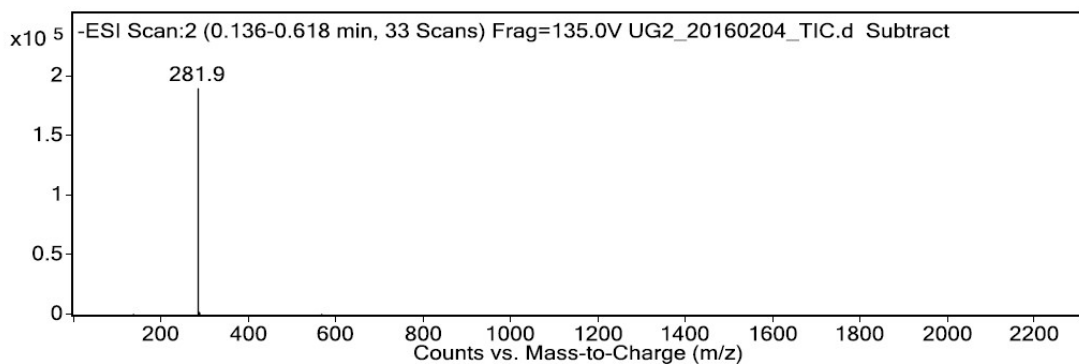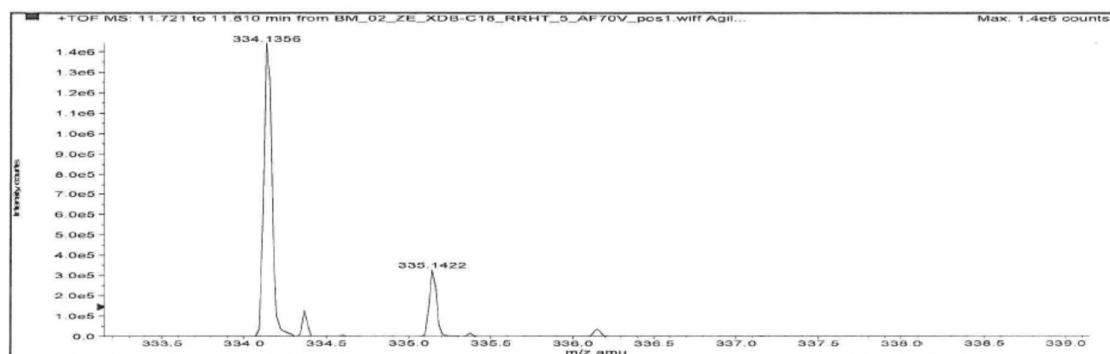

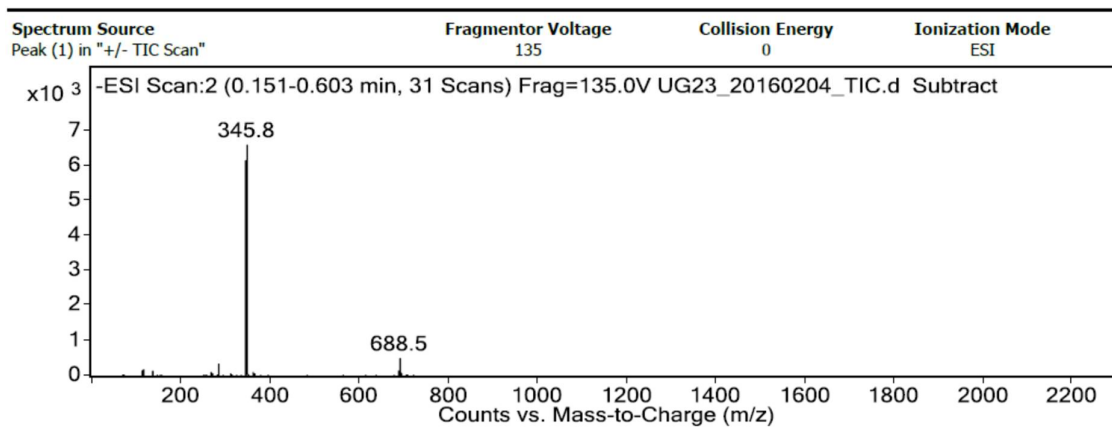

ESI-MS ( $m/z$ ) spectra for compound **1d**: 346.0  $[M + H]^+$

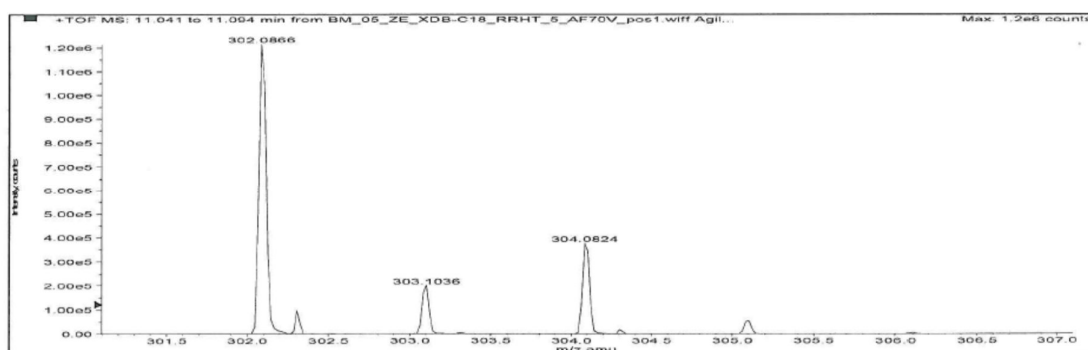

ESI-MS ( $m/z$ ) spectra for compound **1e**: 302.09  $[M + H]^+$

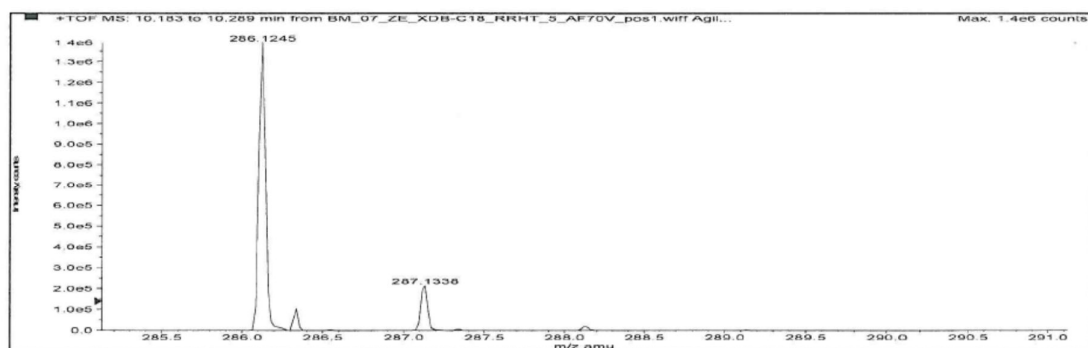

ESI-MS ( $m/z$ ) spectra for compound **1f**: 286.12  $[M + H]^+$

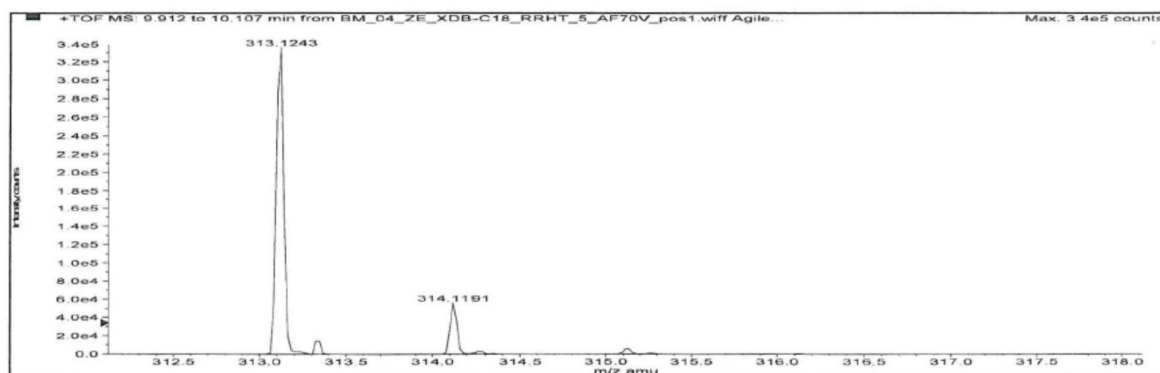

ESI-MS ( $m/z$ ) spectra for compound **1g**: 313.12 [M + H]<sup>+</sup>

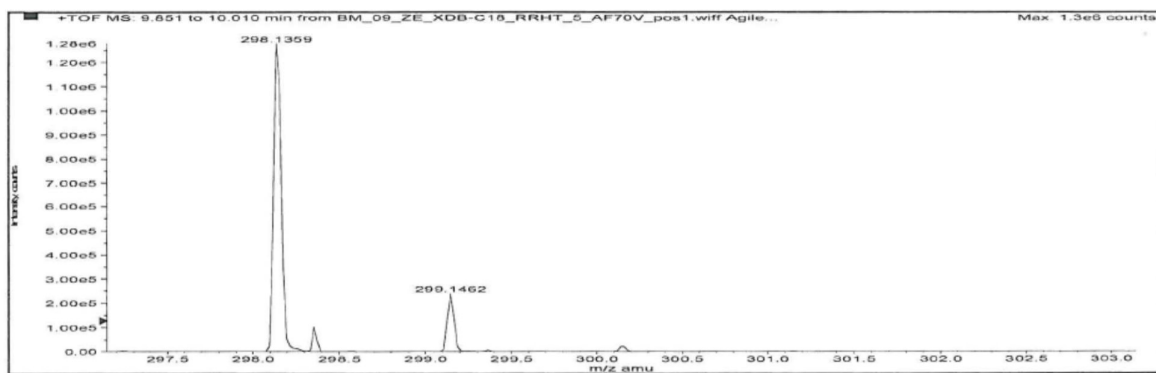

ESI-MS ( $m/z$ ) spectra for compound **1h**: 298.14 [M + H]<sup>+</sup>

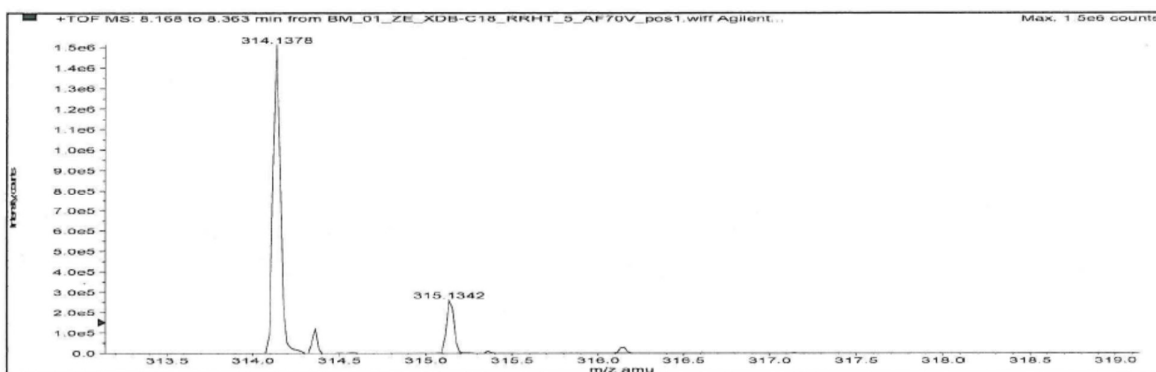

ESI-MS ( $m/z$ ) spectra for compound **1i**: 314.14 [M + H]<sup>+</sup>

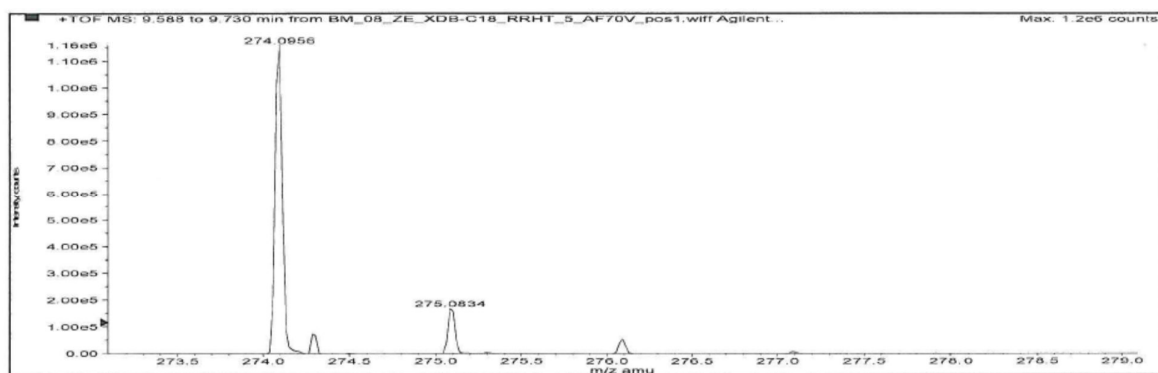

ESI-MS ( $m/z$ ) spectra for compound **1j**: 274.09 [M + H]<sup>+</sup>
